# Supplementary material for: Transcriptome Analysis of Diffuse Large B-Cell Lymphoma Cells Inducibly Expressing MyD88 L265P Mutation Identifies Upregulated CD44, LGALS3, NFKBIZ, and BATF as Downstream Targets of Oncogenic NF-κB Signaling
Source: MDPI journal article supplement (doi:10.3390/ijms24065623), 2023-03-15
Supplement: s1 [file s1]

**Supplementary Table S3.** Univariate and multivariate analysis for CD44 in the dataset GSE10846

|                        |                     | Univariate analysis |                    |         | Multivariate analysis |                    |         |
|------------------------|---------------------|---------------------|--------------------|---------|-----------------------|--------------------|---------|
|                        |                     | N                   | HR (95% CI for HR) | p.value | N                     | HR (95% CI for HR) | p.value |
| <b>Age</b>             |                     |                     |                    |         |                       |                    |         |
|                        | <= median(62.5)     | 207                 | -                  | -       | 207                   | -                  | -       |
|                        | > median(62.5)      | 207                 | 2.2 (1.6-3.1)      | <0.001  | 207                   | 2.2 (1.6-3.1)      | <0.001  |
| <b>Sex</b>             |                     |                     |                    |         |                       |                    |         |
|                        | Female              | 172                 | -                  | -       | 172                   | -                  | -       |
|                        | Male                | 224                 | 1 (0.74-1.4)       | 0,9     | 224                   | 1.2 (0.8-1.6)      | 0,3     |
| <b>Treatment</b>       |                     |                     |                    |         |                       |                    |         |
|                        | CHOP-Like Regimen   | 181                 | -                  | -       | 181                   | -                  | -       |
|                        | R-CHOP-Like Regimen | 233                 | 0.52 (0.38-0.72)   | <0.001  | 233                   | 0.57 (0.4-0.8)     | <0.001  |
| <b>CD44 expression</b> |                     |                     |                    |         |                       |                    |         |
|                        | Low                 | 295                 | -                  | -       | 295                   | -                  | -       |
|                        | High                | 125                 | 1.6 (1.2-2.2)      | 0,0029  | 125                   | 1.6 (1.2-2.2)      | 0,004   |
