# Supplementary material for: Transcriptome Analysis of Diffuse Large B-Cell Lymphoma Cells Inducibly Expressing MyD88 L265P Mutation Identifies Upregulated CD44, LGALS3, NFKBIZ, and BATF as Downstream Targets of Oncogenic NF-κB Signaling
Source: MDPI journal article supplement (doi:10.3390/ijms24065623), 2023-03-15
Supplement: s1 [file s1]

**Supplementary Table S6.** List of primers used for qPCR.

| Gene name | NCBI accession number | Primer name | Sequence (5' -> 3')            | Exon number | Tm (°C) |
|-----------|-----------------------|-------------|--------------------------------|-------------|---------|
| HPRT      | NM_000194             | HPRT Fwd    | AGCCAGACTTTGTTGGATTG           | 7-8         | 56      |
|           |                       | HPRT Rev    | TTTACTGGCGATGTCAATAGG          | 9           | 55      |
| BATF      | NM_006399             | BATF Fwd    | CCCCTGGCAAACAGGACTCAT          | 1-2         | 61      |
|           |                       | BATF Rev    | GCTTGATCTCCTTGCGTAGAGCC        | 3           | 61      |
| LGALS3    | NM_002306             | LGALS3 Fwd  | CAATTTTTCGCTCCATGATGCGTTAT     | 2-3         | 59      |
|           |                       | LGALS3 Rev  | CGGGATAAGCTCCAGGTGCT           | 3           | 61      |
| CD44      | NM_000610             | CD44 Fwd    | GAGCCTGGCGCAGATCG              | 1           | 62      |
|           |                       | CD44 Rev    | CTGCAGGTCTCAAATCCGATG          | 2           | 58      |
| NFKBIZ    | NM_031419             | NFKBIZ Fwd  | TGTGGATGATTTTAAGACACAAGGTGTGAA | 2-3         | 59      |
|           |                       | NFKBIZ Rev  | TCTTCCATGCTCTCCCCGG            | 5           | 61      |

|        |              |            |                             |     |    |
|--------|--------------|------------|-----------------------------|-----|----|
| RAB29  | NM_001135662 | RAB29 Fwd  | CACGGTGGGAGTGGATTTTGC       | 2-3 | 60 |
|        |              | RAB29 Rev  | GGACAGATCACACTTGTTGGC       | 4-5 | 59 |
| ELL2   | NM_012081    | ELL2 Fwd   | CCATATGTAGGGAAAAGAGTGCAAATT | 4-5 | 59 |
|        |              | ELL2 Rev   | TCAGATTGGCTACCTGTTGCAG      | 5-6 | 60 |
| TTLL3  | NM_001025930 | TTLL3 Fwd  | AGAGAGCTGTCAAGCAGAAGAAGA    | 2-3 | 60 |
|        |              | TTLL3 Rev  | CTCATCTTCATCCTCATCCTCAGT    | 3-4 | 61 |
| FHIP2B | NM_022749    | FHIP2B Fwd | CGCCTACATCCTGGAAGGTAAAAA    | 5-6 | 61 |
|        |              | FHIP2B Rev | CCCGACTCTTCTTGCTCTGG        | 6-7 | 59 |
| MyD88  | NM_002468    | MyD88 Fwd  | CCAGCATTGAGGAGGATTGCCA      | 1-2 | 60 |
|        |              | MyD88 Rev  | TCATCTCCTGCACAAACTGGATGT    | 3   | 60 |
