# Supplementary material for: Transcriptome Analysis of Diffuse Large B-Cell Lymphoma Cells Inducibly Expressing MyD88 L265P Mutation Identifies Upregulated CD44, LGALS3, NFKBIZ, and BATF as Downstream Targets of Oncogenic NF-κB Signaling
Source: MDPI journal article supplement (doi:10.3390/ijms24065623), 2023-03-15
Supplement: s1 [file s1]

**Supplementary Table S5.** List of cloning primers.

| Primer name           | Sequence (5' -> 3')               |
|-----------------------|-----------------------------------|
| MyD88 mutagenesis Fwd | GTACTTGATGGGGATCGGTCGCTTCTGATGGGC |
| MyD88 mutagenesis Rev | GCCCATCAGAAGCGACCGATCCCCATCAAGTAC |
| MyD88 EcoRI Fwd       | TATAGAATTCGCCACCATGGCTGCAGGAG     |
| MyD88 AgeI Rev        | TATAACCGGTGACTCAGGGCAGGGA         |
| MyD88 colonyPCR Fwd   | CTGCAGGAGGTCCCGG                  |
| MyD88 colonyPCR Rev   | GGGCAGGGACAAGGCC                  |
