# Supplementary material for: Transcriptome Analysis of Diffuse Large B-Cell Lymphoma Cells Inducibly Expressing MyD88 L265P Mutation Identifies Upregulated CD44, LGALS3, NFKBIZ, and BATF as Downstream Targets of Oncogenic NF-κB Signaling
Source: MDPI journal article supplement (doi:10.3390/ijms24065623), 2023-03-15
Supplement: s1 [file s1]

**Supplementary Table S4.** Information of 22 differentially expressed genes in U2932 cell lines inducible expressing MyD88 vs. MyD88<sup>L265P</sup>.

|                                         | log2<br>FoldChange | Gene<br>symbol | Gene name                                      | Alternative protein<br>names                                                                                                                                                      | Molecular<br>function | Reported in cancer and/or<br>human pathology                                                                                     | Reported in<br>Lymphoma |
|-----------------------------------------|--------------------|----------------|------------------------------------------------|-----------------------------------------------------------------------------------------------------------------------------------------------------------------------------------|-----------------------|----------------------------------------------------------------------------------------------------------------------------------|-------------------------|
| Downregulated by MyD88-L265P expression | -0,9211331         | ANKMY1         | Ankyrin Repeat And MYND<br>Domain Containing 1 | ZMYND13<br>Zinc Finger MYND<br>Domain-<br>Containing Protein<br>13<br>TSAL1<br>Testis-Specific<br>Ankyrin-Like<br>Protein 1<br>FLJ20499                                           | unknown               | Biliary atresia [162]<br><br>Low expression associated<br>with shorter metastasis-free<br>survival time in<br>Osteosarcoma [163] | No                      |
|                                         | -0,59831331        | METTL25<br>B   | Methyltransferase Like 25B                     | C1orf66<br>CGI-41<br>RRNAD1<br>Ribosomal RNA<br>Adenine<br>Dimethylase<br>Domain-<br>Containing Protein<br>1<br>Ribosomal RNA<br>Adenine<br>Dimethylase<br>Domain<br>Containing 1 | unknown               |                                                                                                                                  | No                      |
|                                         | -0,68905052        | GVQW3          | GVQW Motif Containing 3                        |                                                                                                                                                                                   | unknown               |                                                                                                                                  | No                      |

|             |        |                                                       |                                                                                                                                                   |                                                                        |                                                                                                                |    |
|-------------|--------|-------------------------------------------------------|---------------------------------------------------------------------------------------------------------------------------------------------------|------------------------------------------------------------------------|----------------------------------------------------------------------------------------------------------------|----|
| -0,83377977 | FHIP2B | FHF Complex Subunit<br>HOOK Interacting Protein<br>2B | FAM160B2<br>RAI16<br>Family With<br>Sequence<br>Similarity 160<br>Member B2<br>Retinoic Acid<br>Induced Protein 16<br>FLJ21801                    | unknown                                                                | Can enhance the tumor-<br>promoting effect [164]                                                               | No |
| -0,50564632 | POMT1  | Protein O-<br>Mannosyltransferase 1                   | LGMD2K<br>Dolichyl-<br>Phosphate-<br>Mannose--Protein<br>Mannosyltransfera<br>se 1<br>EC 2.4.1.109<br>LGMDR11<br>MDDGA1<br>MDDGB1<br>MDDGC1<br>RT | Synthesizing of<br>O-mannosyl<br>[165]                                 | Walker-Warburg syndrome<br>[166]<br><br>Leukemia [168]<br><br>Acute myeloid leukemia<br>and Kidney tumor [168] | No |
| -0,94536525 | TTLL3  | Tubulin Tyrosine Ligase<br>Like 3                     | HOTTL<br>Tubulin<br>Monoglycylase<br>TTLL3<br>DKFZP434B103<br>EC 6.3.2.-                                                                          | Regulates the<br>stability and<br>function of<br>microtubules<br>[169] | Ovarian cancer [170]                                                                                           | No |

|  |             |       |                             |                                                                                                                                                                                                                      |                                                                                                                                                                                     |                                                                                                                                                                                                                |     |
|--|-------------|-------|-----------------------------|----------------------------------------------------------------------------------------------------------------------------------------------------------------------------------------------------------------------|-------------------------------------------------------------------------------------------------------------------------------------------------------------------------------------|----------------------------------------------------------------------------------------------------------------------------------------------------------------------------------------------------------------|-----|
|  | -0,81900454 | CROCC | Ciliary Rootlet Coiled-Coil | Rootlein<br>TAX1BP2<br>ROLT<br>KIAA0445<br>Tax1-Binding<br>Protein 2<br>CROCC1                                                                                                                                       | Formation and<br>maintenance of<br>cilia<br>cell movement<br>and the sensing<br>of the<br>environment<br>[171]<br><br>Centriole linker<br>[172]<br><br>Centrosome<br>cohesion [173] | Dysfunction of cilia has been<br>linked to the development of<br>certain types of cancer,<br>including ovarian,<br>pancreatic, and breast<br>cancer [174–176], and<br>CROCC may play a role in<br>this process | No  |
|  | -0,50317365 | CD52  | CD52                        | HE5<br>EDDM5<br>CDW52<br>Human<br>Epididymis-<br>Specific Protein 5<br>Epididymal<br>Secretory Protein<br>E5<br>Cambridge<br>Pathology 1<br>Antigen<br>CAMPATH-1<br>Antigen<br>CDW52 Antigen<br>HEL-S-171mP<br>CDw52 | Regulate<br>immune<br>responses [177]                                                                                                                                               | Lymphoma and leukemia<br>[70]<br><br>Chronic lymphocytic<br>leukemia (CLL) therapy [69]                                                                                                                        | Yes |

|                            |             |                     |                          |                                                              |                                                                                                                                       |   |    |
|----------------------------|-------------|---------------------|--------------------------|--------------------------------------------------------------|---------------------------------------------------------------------------------------------------------------------------------------|---|----|
|                            |             |                     |                          | Epididymis<br>Secretory Sperm<br>Binding Protein Li<br>171mP |                                                                                                                                       |   |    |
| Upregulated by MyD88-L265P | 7,40836139  | ENSG0000<br>0258529 | Novel Protein            | Mannosyltransferase<br>EC 2.4.1.-<br>PUS10                   | unknown                                                                                                                               | - | No |
|                            | 1,234046639 | ZNF385C             | Zinc Finger Protein 385C | CTD-2132N18.2<br>CTD-2132N18.4                               | Nucleic acid<br>binding activity<br>and zinc ion<br>binding activity.<br><br>Regulates p53<br>functions in cell<br>cycle arrest [178] | - | No |

|             |       |                                                                                                                                                                                                                                                                                                                                                                              |                                                                                                                                                                                                                                                                                  |                                                                                                                                                                                                                                                                                                            |     |
|-------------|-------|------------------------------------------------------------------------------------------------------------------------------------------------------------------------------------------------------------------------------------------------------------------------------------------------------------------------------------------------------------------------------|----------------------------------------------------------------------------------------------------------------------------------------------------------------------------------------------------------------------------------------------------------------------------------|------------------------------------------------------------------------------------------------------------------------------------------------------------------------------------------------------------------------------------------------------------------------------------------------------------|-----|
| 2,718040483 | PRAME | <p>Preferentially Expressed Antigen In Melanoma</p> <p>CT130</p> <p>MAPE</p> <p>Melanoma Antigen Preferentially Expressed In Tumors</p> <p>PRAME Nuclear Receptor</p> <p>Transcriptional Regulator</p> <p>Preferentially Expressed Antigen Of Melanoma</p> <p>Cancer/Testis Antigen 130</p> <p>Opa-Interacting Protein 4</p> <p>OIP4</p> <p>Opa-Interacting Protein OIP4</p> | <p>Substrate-recognition component of a Cul2-RING (CRL2) E3 ubiquitin-protein ligase complex and regulation of NFY promoters [179]</p> <p>Transcriptional repressor, inhibiting the signaling of retinoic acid through the retinoic acid receptors RARA, RARB and RARG [180]</p> | <p>Regulates cytotoxic drug sensitivity in Hodgkin Lymphoma [74]</p> <p>Acute myelogenous leukemia (AML) and multiple myeloma (MM) and other hematological malignancies [72]</p> <p>Leukemia [73]</p> <p>In DLBCL interact with EZH2 protein and its deletions were associated with poor outcomes [79]</p> | Yes |
|-------------|-------|------------------------------------------------------------------------------------------------------------------------------------------------------------------------------------------------------------------------------------------------------------------------------------------------------------------------------------------------------------------------------|----------------------------------------------------------------------------------------------------------------------------------------------------------------------------------------------------------------------------------------------------------------------------------|------------------------------------------------------------------------------------------------------------------------------------------------------------------------------------------------------------------------------------------------------------------------------------------------------------|-----|

|  |             |      |                                           |                                                                                                                                                                                                                                                    |                                                                                                                               |                                                                                                                                       |     |
|--|-------------|------|-------------------------------------------|----------------------------------------------------------------------------------------------------------------------------------------------------------------------------------------------------------------------------------------------------|-------------------------------------------------------------------------------------------------------------------------------|---------------------------------------------------------------------------------------------------------------------------------------|-----|
|  | 0,715520862 | ELL2 | Elongation Factor For RNA Polymerase II 2 | MRCCAT1<br>Metastatic Renal Cell Carcinoma-Associated Transcript 1<br>RNA Polymerase II Elongation Factor ELL2<br>Elongation Factor, RNA Polymerase II, ELL-Related RNA Polymerase II, Elongation Factor Elongation Factor RNA For Polymerase II 2 | Elongation factor for RNA polymerase II [82]<br><br>Involved in antibody secretion [80]<br><br>Unfolded protein response [81] | Prostate ([181,182]<br><br>Multiple myeloma [183,184]<br><br>In ABC DLBCL, EEL2 represents one of the enrichment signature genes [83] | Yes |
|--|-------------|------|-------------------------------------------|----------------------------------------------------------------------------------------------------------------------------------------------------------------------------------------------------------------------------------------------------|-------------------------------------------------------------------------------------------------------------------------------|---------------------------------------------------------------------------------------------------------------------------------------|-----|

|            |        |                                                  |                                                                                                                                                                                                                                                                                                                                                                                                                                                                                   |                                                                                                                                                                                                                                                         |                                                                               |     |
|------------|--------|--------------------------------------------------|-----------------------------------------------------------------------------------------------------------------------------------------------------------------------------------------------------------------------------------------------------------------------------------------------------------------------------------------------------------------------------------------------------------------------------------------------------------------------------------|---------------------------------------------------------------------------------------------------------------------------------------------------------------------------------------------------------------------------------------------------------|-------------------------------------------------------------------------------|-----|
| 1,05058413 | CYP1A1 | Cytochrome P450 Family 1<br>Subfamily A Member 1 | <p>P450DX<br/>P1-450<br/>P450-C<br/>CP11<br/>Cytochrome P450,<br/>Subfamily I<br/>(Aromatic<br/>Compound-<br/>Inducible),<br/>Polypeptide 1<br/>Hydroperoxy<br/>Icosatetraenoate<br/>Dehydratase<br/>Cytochrome P450<br/>Form 6<br/>Cytochrome P450<br/>1A1<br/>Cytochrome P450-<br/>P1<br/>Cytochrome P450-<br/>C<br/>EC 1.14.14.1<br/>CYPIA1<br/>CYP1<br/>Cytochrome P1-<br/>450, Dioxin-<br/>Inducible<br/>Flavoprotein-<br/>Linked<br/>Monooxygenase<br/>Aryl Hydrocarbon</p> | <p>Metabolism of<br/>certain drugs,<br/>detoxification of<br/>harmful<br/>substances, and<br/>activation of<br/>polycyclic<br/>aromatic<br/>hydrocarbons<br/>(PAHs) found in<br/>tobacco smoke<br/>and other<br/>environmental<br/>pollutants [185]</p> | Polymorphisms in CYP1A1<br>might associate with<br>increased DLBCL risk [186] | Yes |
|------------|--------|--------------------------------------------------|-----------------------------------------------------------------------------------------------------------------------------------------------------------------------------------------------------------------------------------------------------------------------------------------------------------------------------------------------------------------------------------------------------------------------------------------------------------------------------------|---------------------------------------------------------------------------------------------------------------------------------------------------------------------------------------------------------------------------------------------------------|-------------------------------------------------------------------------------|-----|

|             |       |                                  |     |                                                                                                          |                                                                       |                           |    |
|-------------|-------|----------------------------------|-----|----------------------------------------------------------------------------------------------------------|-----------------------------------------------------------------------|---------------------------|----|
|             |       |                                  |     | Hydroxylase<br>Xenobiotic<br>Monooxygenase<br>EC 4.2.1.152<br>AHRR<br>AHH                                |                                                                       |                           |    |
| 0,598514207 | RAB29 | RAB29, Member<br>Oncogene Family | RAS | RAB7L1<br>RAB7, Member<br>RAS Oncogene<br>Family-Like 1<br>Ras-Related<br>Protein Rab-7L1<br>Ras-Related | Vesicular<br>trafficking<br>regulates T cell<br>receptor<br>recycling | Parkinson's Disease [188] | No |



|             |       |                                           |                                                                                                                                                                                                                                                                    |                                                                                                                                                                                  |                                                |    |
|-------------|-------|-------------------------------------------|--------------------------------------------------------------------------------------------------------------------------------------------------------------------------------------------------------------------------------------------------------------------|----------------------------------------------------------------------------------------------------------------------------------------------------------------------------------|------------------------------------------------|----|
|             |       |                                           | Protein Rab-29<br>Rab-7-Like Protein<br>1<br>RAB7L                                                                                                                                                                                                                 | primary cilium<br>assembly [187]                                                                                                                                                 |                                                |    |
| 2,977058501 | AKAP6 | A-Kinase Anchoring Protein<br>6           | AKAP100<br>MAKAP<br>PRKA6<br>KIAA0311<br>ADAP6<br>ADAP100                                                                                                                                                                                                          | Regulation of<br>cellular<br>signaling<br>pathways<br>[189,190]                                                                                                                  | Cardiovascular disease [191]                   | No |
| 0,757418431 | BCAS3 | Breast Carcinoma-<br>Amplified Sequence 3 | BCAS3<br>Microtubule<br>Associated Cell<br>Migration Factor<br>PHAF2<br>Phagophore<br>Assembly Factor 2<br>FLJ20128<br>Rudhira<br>GAOB1<br>Breast Carcinoma<br>Amplified<br>Sequence 4/3<br>Fusion Protein<br>Metastasis<br>Associated Antigen<br>Of Breast Cancer | Regulator of cell<br>growth,<br>apoptosis, and<br>chemoresistance<br>as a part CRL4A<br>complex<br>mediating<br>ubiquitination<br>and proteasomal<br>degradation of<br>p53 [192] | Breast cancer with poor<br>prognosis [192,193] | No |

|             |        |                                      |                                                                                                                                                                                                  |                                                                                                                             |                                                                                                             |    |  |
|-------------|--------|--------------------------------------|--------------------------------------------------------------------------------------------------------------------------------------------------------------------------------------------------|-----------------------------------------------------------------------------------------------------------------------------|-------------------------------------------------------------------------------------------------------------|----|--|
|             |        |                                      |                                                                                                                                                                                                  | Breast Carcinoma<br>Amplified<br>Sequence 3<br>HEMARS<br>MAAB                                                               |                                                                                                             |    |  |
| 1,580603439 | LRRC32 | Leucine Rich Repeat<br>Containing 32 | GARP<br>Glycoprotein A<br>Repetitions<br>Predominant<br>D11S833E<br>Transforming<br>Growth Factor Beta<br>Activator LRRC32<br>Leucine-Rich<br>Repeat-Containing<br>Protein 32<br>Garpin<br>CPRDD | Involved in<br>immunosuppres<br>sive cytokine<br>TGF-β in<br>immune cells,<br>including T regs,<br>platelets<br>[84,85,194] | Immunosuppressive tumor<br>microenvironment [195]<br><br>Role on regulatory T cells in<br>lung cancer [196] | No |  |

|  |             |       |                        |           |                                                                                                                                                                                                                                                                          |                                                                                                    |                                                                                                                                                                                                                                                                                                                                                              |     |
|--|-------------|-------|------------------------|-----------|--------------------------------------------------------------------------------------------------------------------------------------------------------------------------------------------------------------------------------------------------------------------------|----------------------------------------------------------------------------------------------------|--------------------------------------------------------------------------------------------------------------------------------------------------------------------------------------------------------------------------------------------------------------------------------------------------------------------------------------------------------------|-----|
|  | 0,576702076 | CCL22 | C-C Motif<br>Ligand 22 | Chemokine | MDC<br>A-152E5.1<br>DC/B-CK<br>STCP-1<br>ABCD-1<br>SCYA22<br>Small Inducible<br>Cytokine<br>Subfamily A (Cys-<br>Cys), Member 22<br>CC Chemokine<br>STCP-1<br>MGC34554<br>Stimulated T Cell<br>Chemotactic<br>Protein 1<br>Stimulated T-Cell<br>Chemotactic<br>Protein 1 | Immunoregulatory<br>and<br>inflammatory<br>processes [197]<br><br>Ligand for CCR4<br>receptor [93] | Head and neck squamous<br>cell carcinoma [198,199]<br><br>Breast cancer [197,200]<br><br>Lung cancer [201]<br><br>Colorectal adenocarcinoms<br>[202]<br><br>Hodgkin lymphoma [92,94]<br><br>T-cell Lymphoma [93]<br><br>B-cell lymphoproliferative<br>disorder [95]<br><br>In DLBCL, CCL22 has been<br>described in the gene<br>enrichment signature [83,96] | Yes |
|--|-------------|-------|------------------------|-----------|--------------------------------------------------------------------------------------------------------------------------------------------------------------------------------------------------------------------------------------------------------------------------|----------------------------------------------------------------------------------------------------|--------------------------------------------------------------------------------------------------------------------------------------------------------------------------------------------------------------------------------------------------------------------------------------------------------------------------------------------------------------|-----|

|  |             |      |                                                    |                                                                                                                                                                 |                                                                          |                                                                                                                                                                                      |     |
|--|-------------|------|----------------------------------------------------|-----------------------------------------------------------------------------------------------------------------------------------------------------------------|--------------------------------------------------------------------------|--------------------------------------------------------------------------------------------------------------------------------------------------------------------------------------|-----|
|  | 0,932599387 | BATF | Basic Leucine Zipper ATF-Like Transcription Factor | B-ATF<br>SFA-2<br>BATF1<br>Basic Leucine Zipper Transcription Factor, ATF-Like B-Cell-Activating Transcription Factor<br>SFA2<br>SF-HT-Activated Gene 2 Protein | Transcriptional regulators modulation of AP-1 transcription complex [97] | Anaplastic large cell lymphoma [101]<br><br>High BATF expression was demonstrated in DLBCL samples [106] and is considered a part of the gene enrichment signature of ABC DLBCL [83] | Yes |
|--|-------------|------|----------------------------------------------------|-----------------------------------------------------------------------------------------------------------------------------------------------------------------|--------------------------------------------------------------------------|--------------------------------------------------------------------------------------------------------------------------------------------------------------------------------------|-----|

|  |             |        |                     |                                                                                                                                                                     |                                                                              |                                                                                                                                                                                                                                                                                                                                                                                                                                                                                                                                    |     |
|--|-------------|--------|---------------------|---------------------------------------------------------------------------------------------------------------------------------------------------------------------|------------------------------------------------------------------------------|------------------------------------------------------------------------------------------------------------------------------------------------------------------------------------------------------------------------------------------------------------------------------------------------------------------------------------------------------------------------------------------------------------------------------------------------------------------------------------------------------------------------------------|-----|
|  | 0,696590349 | NFKBIZ | NFKB Inhibitor Zeta | MAIL<br>INAP<br>IL-1 Inducible<br>Nuclear Ankyrin-<br>Repeat Protein<br>B-Cells Inhibitor,<br>Zeta<br>I-Kappa-B-Zeta<br>IkappaBzeta<br>FLJ34463<br>IKBZ<br>IkB-Zeta | Regulator of<br>inflammation,<br>cell proliferation<br>and survival<br>[110] | Bladder cancer [113]<br><br>High IκBζ expression was explicitly detected in ABC DLBCL [45]. Moreover, amplification of the NFKBIZ locus has been observed in ~10% of ABC DLBCL cases [114]<br><br>Overexpression of the IκBζ protein, which activates the NF-κB signaling pathway and provides a selective advantage to tumor cells [115,116]<br><br>The increase of NFKBIZ transcript and IκBζ protein was demonstrated due to constitutive oncogenic NF-κB signaling in MyD88L265P or CARD11L244P-expressing lymphoma cells [45] | Yes |
|--|-------------|--------|---------------------|---------------------------------------------------------------------------------------------------------------------------------------------------------------------|------------------------------------------------------------------------------|------------------------------------------------------------------------------------------------------------------------------------------------------------------------------------------------------------------------------------------------------------------------------------------------------------------------------------------------------------------------------------------------------------------------------------------------------------------------------------------------------------------------------------|-----|

|             |        |            |                                                                                                                                                                                                                                                                                                                                                                                                                                |                                                                                                                  |                                                                                                                                                                                                                                                                                                                                                                                          |     |
|-------------|--------|------------|--------------------------------------------------------------------------------------------------------------------------------------------------------------------------------------------------------------------------------------------------------------------------------------------------------------------------------------------------------------------------------------------------------------------------------|------------------------------------------------------------------------------------------------------------------|------------------------------------------------------------------------------------------------------------------------------------------------------------------------------------------------------------------------------------------------------------------------------------------------------------------------------------------------------------------------------------------|-----|
| 1,370455524 | LGALS3 | Galectin 3 | <p>GALIG<br/>Advanced Glycation End-Product Receptor 3<br/>Lectin, Galactoside-Binding, Soluble, 3<br/>Carbohydrate-Binding Protein 35<br/>Galactose-Specific Lectin 3<br/>Laminin-Binding Protein<br/>IgE-Binding Protein<br/>Lectin L-29<br/>LGALS2<br/>GALBP<br/>MAC2<br/>Epididymis Secretory Sperm Binding Protein<br/>Galactoside-Binding Protein<br/>Mac-2 Antigen<br/>CBP 35<br/>CBP35<br/>Gal-3<br/>GAL3<br/>L-31</p> | <p>Cell adhesion, proliferation, differentiation, apoptosis, signaling, and immune system function [119,120]</p> | <p>Acute myeloid leukemia (AML) [124]<br/><br/>Chronic lymphocytic leukemia (CLL) [125]<br/><br/>Prognostic factor in Hodgkin's lymphoma [126]<br/><br/>In DLBCL, multiple studies associated overexpressed Gal-3 with increased cell proliferation, survival, and disease aggressiveness and identified GAL-3 as a prognostic factor and potential target for therapy [127,130–132]</p> | Yes |
|-------------|--------|------------|--------------------------------------------------------------------------------------------------------------------------------------------------------------------------------------------------------------------------------------------------------------------------------------------------------------------------------------------------------------------------------------------------------------------------------|------------------------------------------------------------------------------------------------------------------|------------------------------------------------------------------------------------------------------------------------------------------------------------------------------------------------------------------------------------------------------------------------------------------------------------------------------------------------------------------------------------------|-----|

|             |      |                                    |                                                                                                                                                                                                                                                                                                                                                                                                                                                                                                                                                                                        |                                                                                                                                                                                                                                                                                                                                                                                                                                                                                                                                                             |                                                                                                                                                                                                                                  |     |
|-------------|------|------------------------------------|----------------------------------------------------------------------------------------------------------------------------------------------------------------------------------------------------------------------------------------------------------------------------------------------------------------------------------------------------------------------------------------------------------------------------------------------------------------------------------------------------------------------------------------------------------------------------------------|-------------------------------------------------------------------------------------------------------------------------------------------------------------------------------------------------------------------------------------------------------------------------------------------------------------------------------------------------------------------------------------------------------------------------------------------------------------------------------------------------------------------------------------------------------------|----------------------------------------------------------------------------------------------------------------------------------------------------------------------------------------------------------------------------------|-----|
| 0,594912298 | CD44 | CD44 Molecule (Indian Blood Group) | <p>HUTCH-I</p> <p>HCELL</p> <p>CSPG8</p> <p>MC56</p> <p>Pgp1</p> <p>MDU2</p> <p>MDU3</p> <p>MIC4</p> <p>IN</p> <p>Hematopoietic Cell</p> <p>E- And L-Selectin</p> <p>Ligand</p> <p>GP90 Lymphocyte</p> <p>Homing/Adhesion</p> <p>Receptor</p> <p>Chondroitin</p> <p>Sulfate</p> <p>Proteoglycan 8</p> <p>Extracellular</p> <p>Matrix Receptor III</p> <p>Homing Cell</p> <p>Adhesion Molecule</p> <p>Heparan Sulfate</p> <p>Proteoglycan</p> <p>Phagocyte</p> <p>Glycoprotein 1</p> <p>Hyaluronate</p> <p>Receptor</p> <p>In(Lu) Related-P80</p> <p>Hermes Antigen</p> <p>Hermes-1</p> | <p>Multifunctional</p> <p>transmembrane</p> <p>receptor binding</p> <p>to various</p> <p>ligands,</p> <p>including</p> <p>hyaluronic acid</p> <p>(HA), collagen,</p> <p>and osteopontin,</p> <p>which can</p> <p>modulate its</p> <p>activity. Cell</p> <p>adhesion and</p> <p>migration, and it</p> <p>is involved in</p> <p>the activation</p> <p>and regulation</p> <p>of the immune</p> <p>system and the</p> <p>formation and</p> <p>maintenance of</p> <p>the extracellular</p> <p>matrix [139,142]</p> <p>Cell</p> <p>dissemination</p> <p>[143]</p> | <p>Hodgkin andnon-Hodgkin</p> <p>lymphoma [59]</p> <p>Prognostic factor in non-</p> <p>Hodgkin's lymphoma [55]</p> <p>In ABC DLBCL, CD44 was</p> <p>identified as a part of the</p> <p>gene enrichment signature</p> <p>[83]</p> | Yes |
|-------------|------|------------------------------------|----------------------------------------------------------------------------------------------------------------------------------------------------------------------------------------------------------------------------------------------------------------------------------------------------------------------------------------------------------------------------------------------------------------------------------------------------------------------------------------------------------------------------------------------------------------------------------------|-------------------------------------------------------------------------------------------------------------------------------------------------------------------------------------------------------------------------------------------------------------------------------------------------------------------------------------------------------------------------------------------------------------------------------------------------------------------------------------------------------------------------------------------------------------|----------------------------------------------------------------------------------------------------------------------------------------------------------------------------------------------------------------------------------|-----|

|  |  |  |  |                                                                                                                                                                                                                |  |  |  |
|--|--|--|--|----------------------------------------------------------------------------------------------------------------------------------------------------------------------------------------------------------------|--|--|--|
|  |  |  |  | ECMR-III<br>HUTCH-1<br>ECM-III<br>Epican<br>PGP-1<br>CD44R<br>CDw44<br>H-CAM<br>LHR<br>Extracellular<br>Matrix Receptor-III<br>Indian Blood<br>Group Antigen<br>Phagocytic<br>Glycoprotein I<br>CDW44<br>PGP-I |  |  |  |
|--|--|--|--|----------------------------------------------------------------------------------------------------------------------------------------------------------------------------------------------------------------|--|--|--|

Reference in the main text
